# Supplementary material
Source: PubMed Central journal article supplement (PMC2715807)
Supplement: supp_29_15_4283__1.pdf [file supp_29_15_4283__1.pdf]

## Supplemental figure legends

**Figure S1. Sequence of XRCC2 mutant cDNAs.** The four *XRCC2* cDNAs were re-sequenced in each orientation to confirm the nature of the gene product. DNA sequence (red) beginning at codon 45 (amino acid sequences in blue) for each cDNA is shown. The del G53 K54 cDNA is interrupted to align sequence either side of the deletion with the other cDNAs.

**Figure S2. Southern blot analysis of long tract gene conversions.** Southern analysis of long tract gene conversions reported in **Figures 3 and 6**. **A.** Schematic of the rearrangements identified within the reporter with restriction maps. **B.** Representative Southern blot analysis of genomic DNA from two distinct BSD-resistant (LTGC) clones. Genomic DNA was analyzed by use of two parallel restriction digests: PstI alone (P); and PstI + I-SceI (P/I), with use of a *GFP* probe. The empty arrowhead marks the expected migration (at ~5.9 kb) of the *GFP*-hybridizing band from an unrearranged parental reporter following digestion with PstI alone. Note that, in the two clones shown, the PstI-digested fragments migrate slower than 5.9 kb, indicating that the reporter has been rearranged during LTGC. The two lanes on the left show an “early termination” LTGC clone; note the absence of an I-SceI site in the rearranged reporter. The two lanes on the right show a “*GFP* triplication” clone; note the presence of an I-SceI site in the third *GFP* copy, revealed as a 1.3 kb band (filled arrowhead), released by addition of I-SceI to the PstI digest.

**Figure S3. Transient expression of *hXRCC3* rescues gene conversion defect in *irs1SF XRCC3<sup>-/-</sup>* cells.** I-SceI induced HR in *irs1SF* HR16, HR70 and HR7, transiently co-transfected with I-SceI expression vector and either empty vector (grey bars) or *hXRCC3* expression plasmid (black bars).

**Figure S4. *XRCC3* specifically restores HR to *irs1SF* cells.** Frequency of I-SceI induced HR in *irs1SF* HR16 cells, co-transfected with I-SceI and either empty vector, wt *hXRCC3*, wt *hRad51* or other wt *Rad51* paralog expression plasmids.

**Figure S5. Lysine 113 but not threonine 241 is required for efficient *XRCC3* HR function.**

I-SceI induced HR in *irs1SF* HR16 cells transiently transfected with control empty vector, wt *XRCC3* or the indicated *XRCC3* mutant expression plasmids.

XRCC2 wild type

```

GAA TTT CAT GGC CCA GAA GGA ACA GGA AAA ACA GAA ATG CTT TAT CAC CTA ACA GCA CGA
CTT AAA GTA CCG GGT CTT CCT TGT CCT TTT TGT CTT TAC GAA ATA GTG GAT TGT CGT GCT
45▶ E F H G P E G T G K T E M L Y H L T A R

```

XRCC2 K54R

```

GAA TTT CAT GGC CCA GAA GGA ACA GGA AGA ACA GAA ATG CTT TAT CAC CTA ACA GCA CGA
CTT AAA GTA CCG GGT CTT CCT TGT CCT TCT TGT CTT TAC GAA ATA GTG GAT TGT CGT GCT
45▶ E F H G P E G T G R T E M L Y H L T A R

```

XRCC2 K54A

```

GAA TTT CAT GGC CCA GAA GGA ACA GGA GCA ACA GAA ATG CTT TAT CAC CTA ACA GCA CGA
CTT AAA GTA CCG GGT CTT CCT TGT CCT CGT TGT CTT TAC GAA ATA GTG GAT TGT CGT GCT
45▶ E F H G P E G T G A T E M L Y H L T A R

```

XRCC2 del G53 K54

```

GAA TTT CAT GGC CCA GAA GGA ACA ---- ACA GAA ATG CTT TAT CAC CTA ACA GCA CGA
CTT AAA GTA CCG GGT CTT CCT TGT ---- TGT CTT TAC GAA ATA GTG GAT TGT CGT GCT
45▶ E F H G P E G T T E M L Y H L T A R

```

## Supplementary Fig. 1

**A**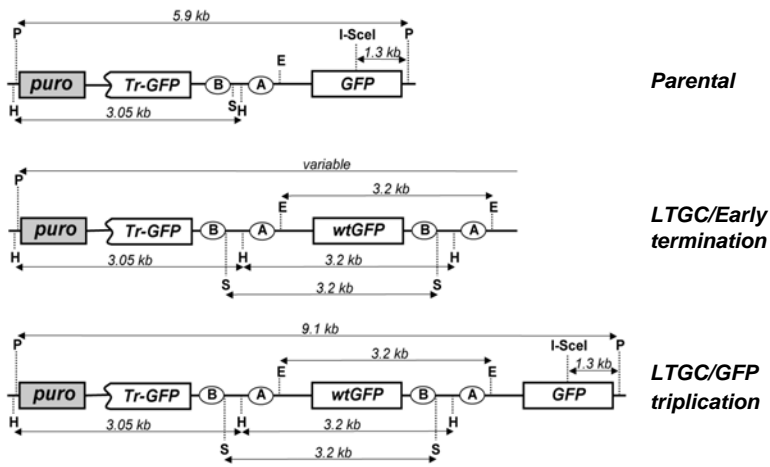**B**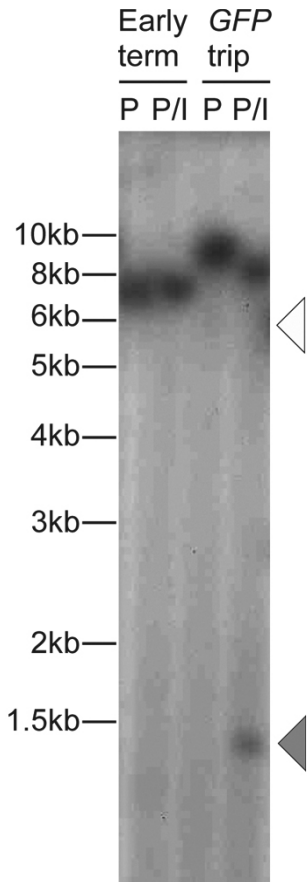**Supplementary Fig. 2**

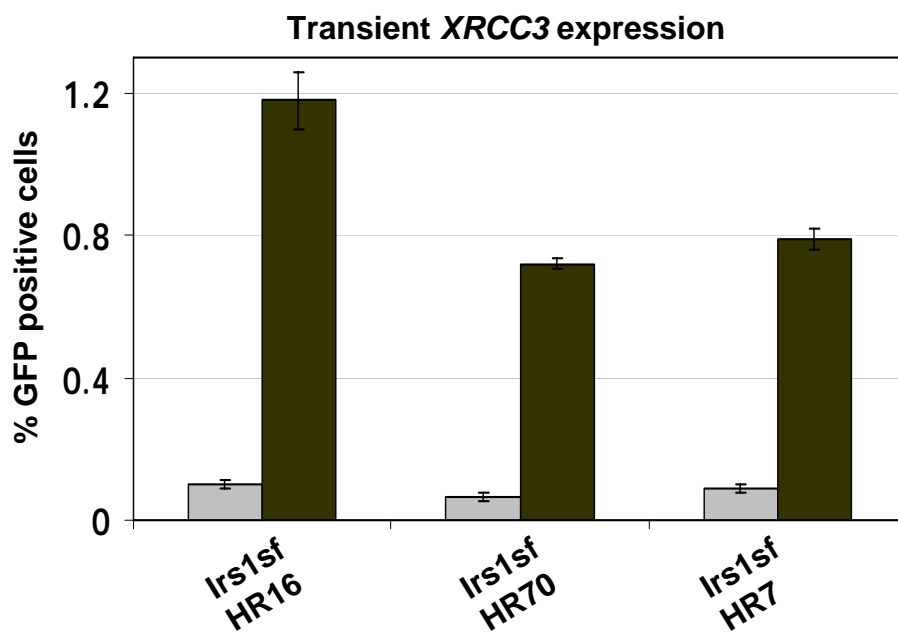

**Supplementary Fig. 3**

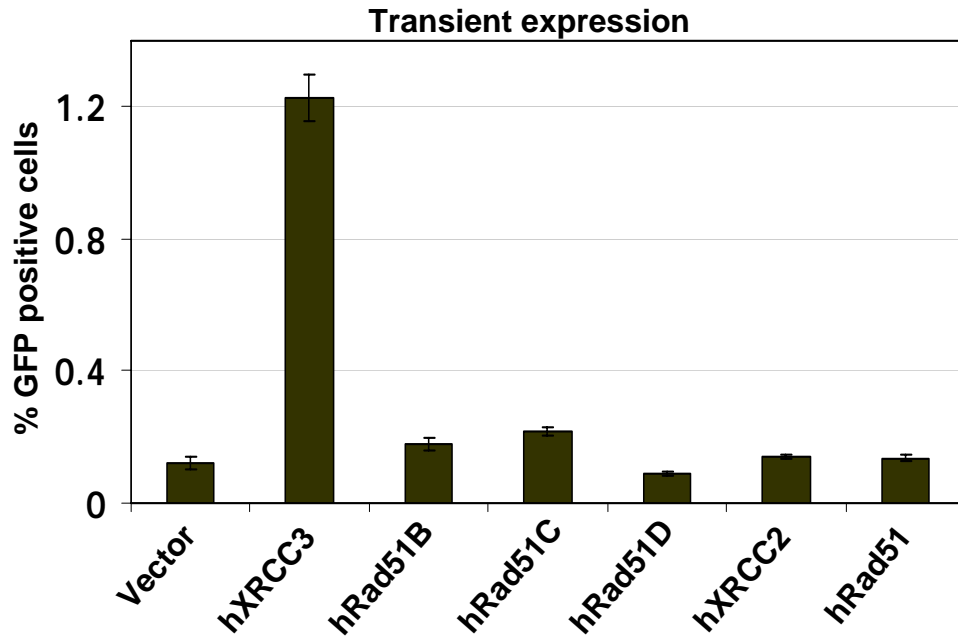

**Supplementary Fig. 4**

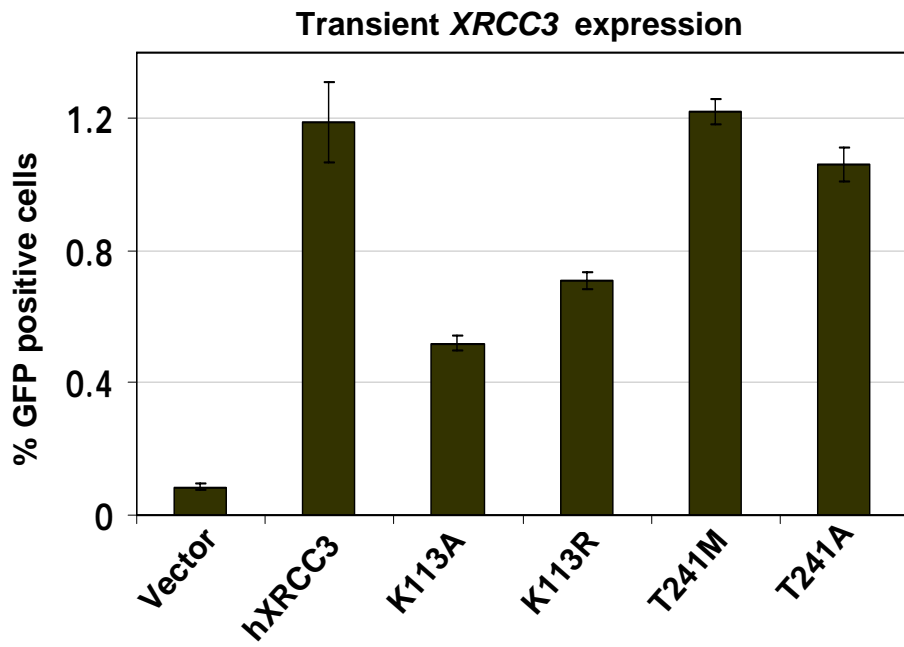

**Supplementary Fig. 5**
